# Supplementary material for: Vaccine Literacy and Source of Information about Vaccination among Staff of Nursing Homes: A Cross-Sectional Survey Conducted in Tuscany (Italy)
Source: MDPI journal article supplement (doi:10.3390/vaccines10050682), 2022-04-25

**Supplementary Figure S1.** HLVa-IT – Functional subscale - by main source of information on vaccines and vaccinations: mean values and error bars.

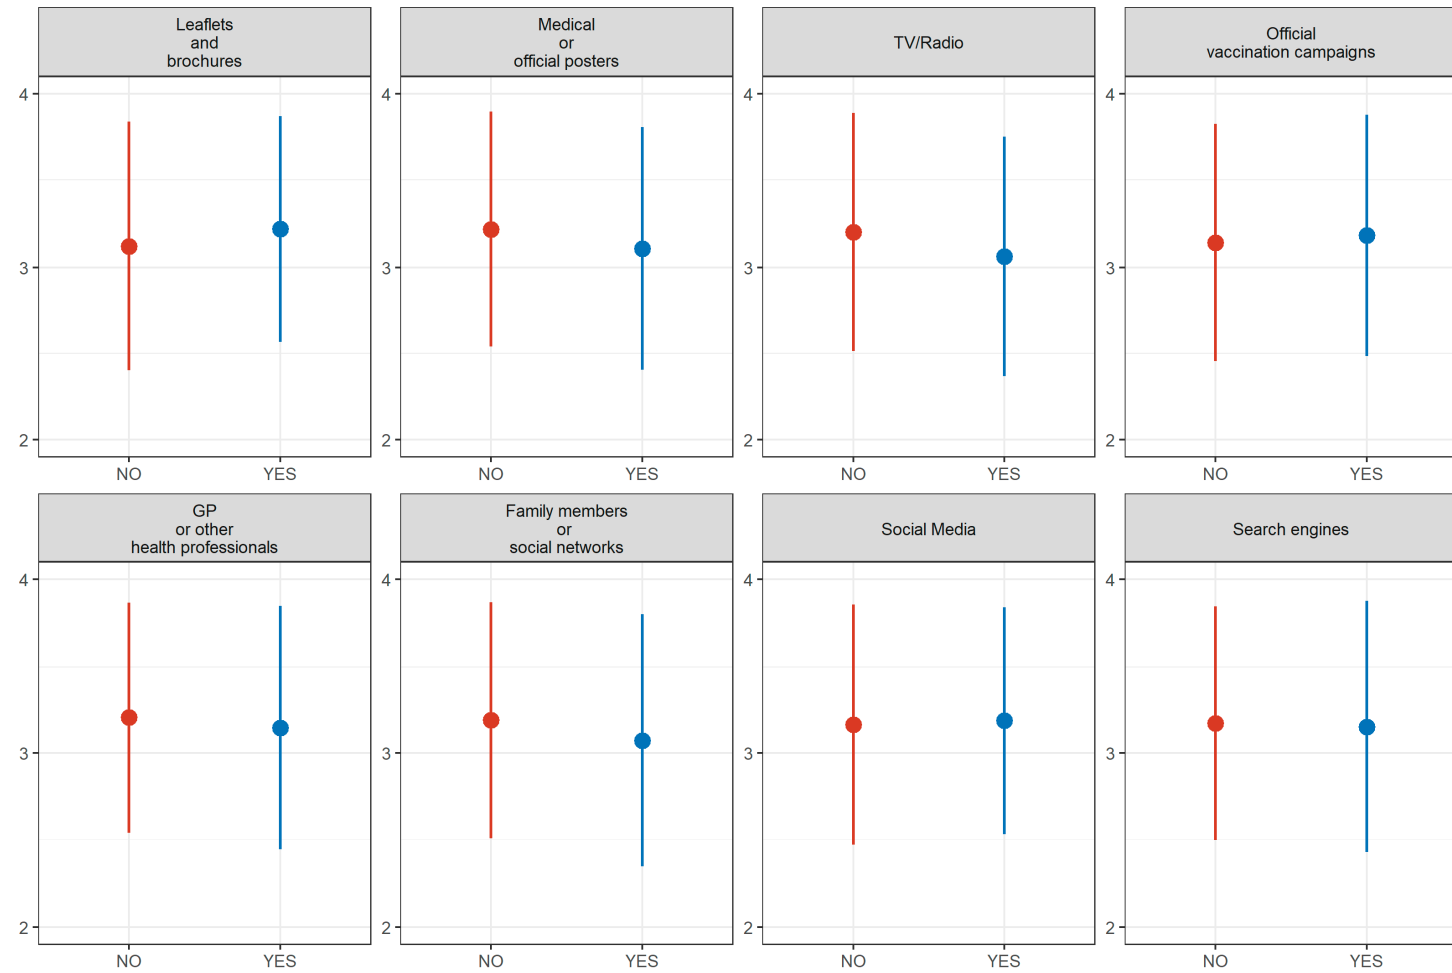

**Supplementary Figure S2.** HLVa-IT – interactive/communicative/critical subscale - by main source of information on vaccines and vaccinations: mean values and error bars.

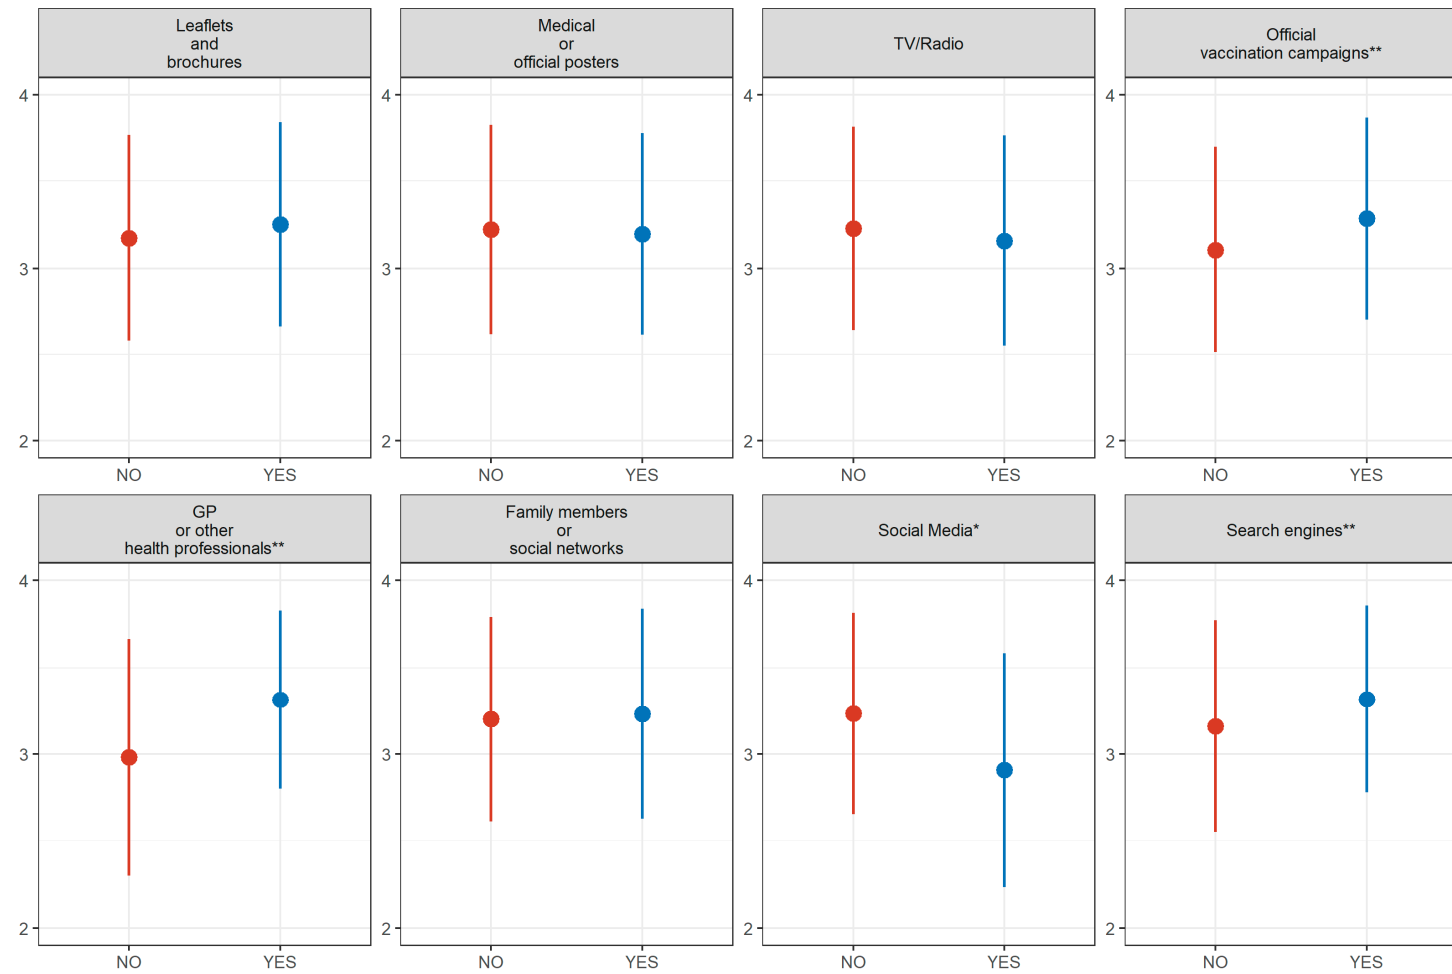

**Supplementary Figure S3.** HLVa-IT total score by main source of information on vaccines and vaccinations: mean values and error bars.

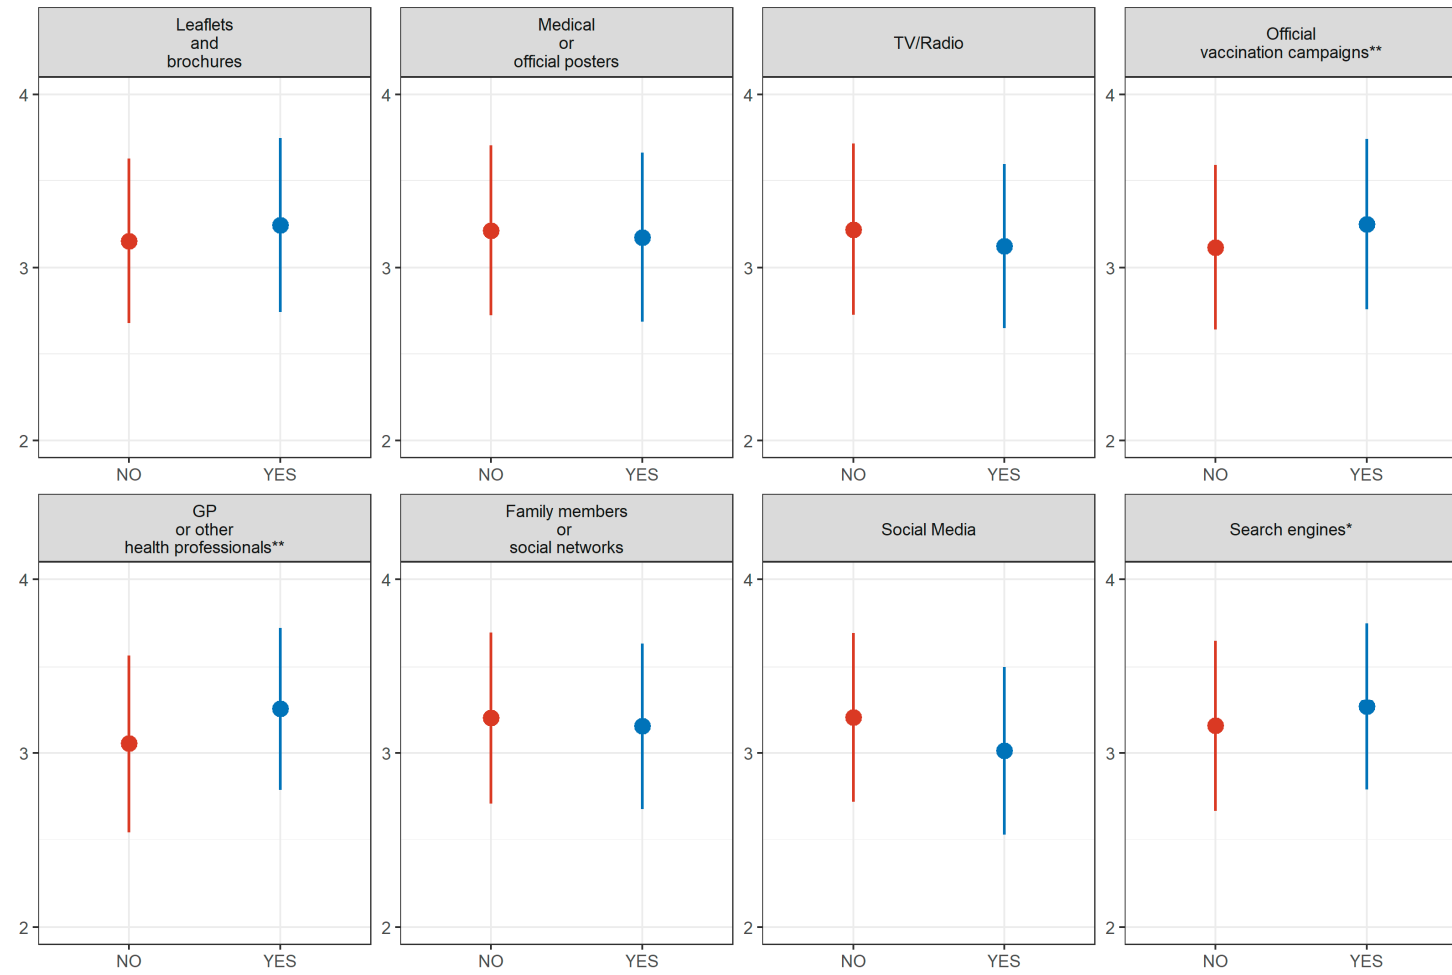

Supplement: s1 [file s1]
